# Supplementary material
Source: PubMed Central journal article supplement (PMC3230681)
Supplement: NIHMS321701-supplement-01.pdf [file NIHMS321701-supplement-01.pdf]

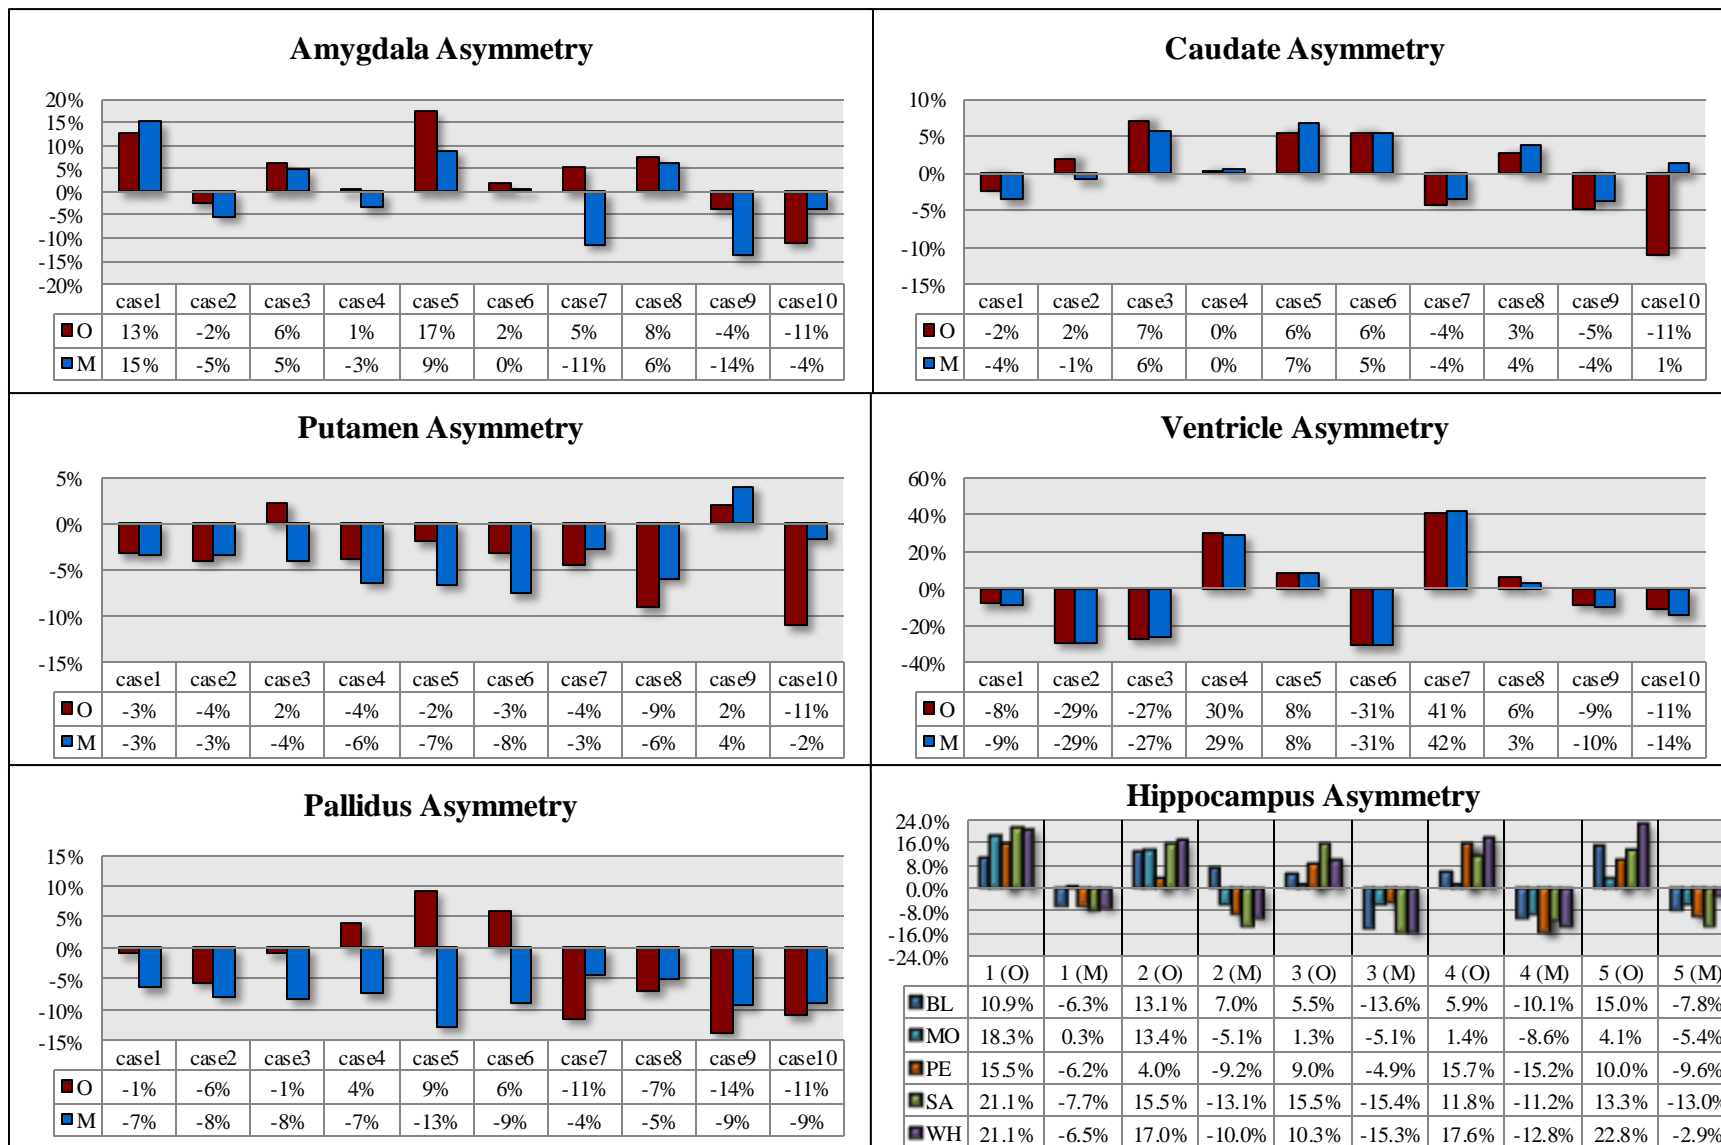

**Figure 1** - Volume asymmetry for structures segmented on mirrored (M) and original (O) images. The hippocampus asymmetry is shown for all 5 raters. Hippocampal volume asymmetry for mirrored-image segmentations appears to be nearly inverted from the original-image asymmetry.
